# Supplementary material for: The Translocator Protein (TSPO) Genetic Polymorphism A147T is Associated with Worse Survival in Male Glioblastoma Patients
Source: Preprints.org preprint supplement (doi:10.20944/preprints202108.0135.v1), 2021-08-05
Supplement: Supplementary file 2 [file supplementary]

Archive with 2 entries (2 files):
- Supplementary Figures/Supplementary Figures 1-4.pdf
- Supplementary Figures/Supplementary Table 1.xlsx
