# Supplementary material for: The Translocator Protein (TSPO) Genetic Polymorphism A147T is Associated with Worse Survival in Male Glioblastoma Patients
Source: Preprints.org preprint supplement (doi:10.20944/preprints202108.0135.v1), 2021-08-05
Supplement: Supplementary file 2 [file supplementary › Supplementary Figures/Supplementary Table 1.xlsx]

## Sheet: Sheet1
	Supplementary Table 1: Statistical analysis data for Kaplan-Meier Survival curves of Figures 2, 3, and 4.
	Figure 2	CGGA Dataset							Histology: GBM Subtype: All Cutoff: median
		Biological sex	All		Male		Female
		TSPO mRNA Expression	High	Low	High	Low	High	Low
		Events	93	89	57	59	37	29
		Median (months)	14.8	19.2	15.9	16.5	13	22.4
		Hazard Ratio (HR) with 95% CI	0.88 (0.66 - 1.17)		1.07 (0.74 - 1.54)		0.57 (0.35 - 0.93)
		TCGA-GBM Dataset							Histology: GBM Subtype: All Cutoff: median
		Biological sex	All		Male		Female
		TSPO mRNA Expression	High	Low	High	Low	High	Low
		Events	215	205	130	130	80	75
		Median (months)	13.3	13.9	13.9	13.3	12.2	15.7
		Hazard Ratio (HR) with 95% CI	0.88 (0.73 - 1.07)		1 (0.78 - 1.28)		0.7 (0.51 - 0.97)
		Gravendeel Dataset							Histology: GBM Subtype: All Cutoff: median
		Biological sex	All		Male		Female
		TSPO mRNA Expression	High	Low	High	Low	High	Low
		Events	73	74	50	50	23	24
		Median (months)	7.7	11.8	7.7	10.6	7.1	13.6
		Hazard Ratio (HR) with 95% CI	0.6 (0.43 - 0.84)		0.68 (0.46 - 1)		0.49 (0.26 - 0.89)
	Figure 3	Stratified by Biological Sex only
		Biological sex	All			Male			Female
		Genotype	AA	AG	GG	AA	AG	GG	AA	AG	GG
		Median (months)	25.3	13.6	14.7	29.9	13.87	14.3	19.6	11	15.9
		95% CI	18.2 - 47.5	11.2 - 15.3	12.8 - 18	19.8 - 56.3	11.6 - 16.6	11.6 - 18	13.8 - NA	5.7 - 15.3	12.6 - 25.2
		Stratified by Treatment received
		Biological sex	All			Male			Female
		Genotype	AA	AG	GG	AA	AG	GG	AA	AG	GG
		Median (months)	36.2	18.2	20.9	51.3	18.8	18.5	19.6	15.9	24.6
		95% CI	21.2 - 67.9	15.9 - 21.1	16.7 - 27.2	25.9 - NA	16.6 - 22.8	14.7 - 30.3	13.8 - NA	13.8 - 53.7	16 - 36
	Figure 4	Stratified by Biological Sex only
		Biological sex	All			Male			Female
		Genotype	AA	AG	GG	AA	AG	GG	AA	AG	GG
		Median (months)	11.8	7.1	8.1	25.7	7.7	8.1	3.9	5.4	11
		95% CI	7.6 - 29.6	5.7 - 8.5	7.1 - 11.2	11.8 - 54.2	6 - 9.1	6.8 - 11.1	3.3 - NA	3.4 - 9.8	5.4 - 17.3
		Stratified by Treatment received
		Biological sex	All			Male			Female
		Genotype	AA	AG	GG	AA	AG	GG	AA	AG	GG
		Median (months)	13.7	8.5	12.1	25.7	8.6	10.5	5.4	8.5	12.4
		95% CI	7.7 - 37.2	7.3 - 11.9	8.6 - 16.8	13.7 - NA	7.2 - 12.8	7.1 - 16.8	3 - NA	6.2 - 22.2	11 - 27.3
